# Supplementary material
Source: publisher figshare collection journal article supplement (https://acs.figshare.com/ndownloader/files/4574353)
Supplement: Supplementary file 1 [file 4574353]

 
data_pl330
 
_audit_creation_method            SHELXL-97
_chemical_name_systematic
;
 ?
;
_chemical_name_common             ?
_chemical_melting_point           ?
_chemical_formula_moiety        'C20 H34 N2 O W'
_chemical_formula_sum
 'C20 H34 N2 O W'
_chemical_formula_weight          502.34
 
loop_
 _atom_type_symbol
 _atom_type_description
 _atom_type_scat_dispersion_real
 _atom_type_scat_dispersion_imag
 _atom_type_scat_source
 'C'  'C'   0.0033   0.0016
 'International Tables Vol C Tables 4.2.6.8 and 6.1.1.4'
 'H'  'H'   0.0000   0.0000
 'International Tables Vol C Tables 4.2.6.8 and 6.1.1.4'
 'N'  'N'   0.0061   0.0033
 'International Tables Vol C Tables 4.2.6.8 and 6.1.1.4'
 'O'  'O'   0.0106   0.0060
 'International Tables Vol C Tables 4.2.6.8 and 6.1.1.4'
 'W'  'W'  -0.8490   6.8722
 'International Tables Vol C Tables 4.2.6.8 and 6.1.1.4'
 
_symmetry_cell_setting            'Triclinic'
_symmetry_space_group_name_H-M    'P-1'
 
loop_
 _symmetry_equiv_pos_as_xyz
 'x, y, z'
 '-x, -y, -z'
 
_cell_length_a                    8.2309(10)
_cell_length_b                    9.3822(12)
_cell_length_c                    14.3092(19)
_cell_angle_alpha                 91.360(7)
_cell_angle_beta                  96.015(6)
_cell_angle_gamma                 115.192(6)
_cell_volume                      991.5(2)
_cell_formula_units_Z             2
_cell_measurement_temperature     173(2)
_cell_measurement_reflns_used     ?
_cell_measurement_theta_min       1.4
_cell_measurement_theta_max       28.1
 
_exptl_crystal_description        block
_exptl_crystal_colour               orange
_exptl_crystal_size_max          0.5
_exptl_crystal_size_mid           0.4
_exptl_crystal_size_min           0.2
_exptl_crystal_density_meas       ?
_exptl_crystal_density_diffrn     1.683
_exptl_crystal_density_method     'not measured'
_exptl_crystal_F_000              500
_exptl_absorpt_coefficient_mu     5.834
_exptl_absorpt_correction_type    'Multi-scan'
_exptl_absorpt_correction_T_min   0.0598
_exptl_absorpt_correction_T_max  0.3114
_exptl_absorpt_process_details    ?
 
_exptl_special_details
;
 ?
;
 
_diffrn_ambient_temperature       173(2)
_diffrn_radiation_wavelength      0.71073
_diffrn_radiation_type            MoK\a
_diffrn_radiation_source          'fine-focus sealed tube'
_diffrn_radiation_monochromator   graphite
_diffrn_measurement_device_type   ?
_diffrn_measurement_method        ?
_diffrn_detector_area_resol_mean  ?
_diffrn_standards_number          ?
_diffrn_standards_interval_count  ?
_diffrn_standards_interval_time   ?
_diffrn_standards_decay_%         ?
_diffrn_reflns_number             20888
_diffrn_reflns_av_R_equivalents   0.0304
_diffrn_reflns_av_sigmaI/netI     0.0231
_diffrn_reflns_limit_h_min        -10
_diffrn_reflns_limit_h_max        10
_diffrn_reflns_limit_k_min        -12
_diffrn_reflns_limit_k_max        12
_diffrn_reflns_limit_l_min        -18
_diffrn_reflns_limit_l_max        18
_diffrn_reflns_theta_min          1.44
_diffrn_reflns_theta_max          28.12
_reflns_number_total              4705
_reflns_number_gt                 4533
_reflns_threshold_expression      >2sigma(I)
 
_computing_data_collection        ?
_computing_cell_refinement        ?
_computing_data_reduction         ?
_computing_structure_solution     ?
_computing_structure_refinement   'SHELXL-97 (Sheldrick, 1997)'
_computing_molecular_graphics     ?
_computing_publication_material   ?
 
_refine_special_details
;
 Refinement of F^2^ against ALL reflections.  The weighted R-factor wR and
 goodness of fit S are based on F^2^, conventional R-factors R are based
 on F, with F set to zero for negative F^2^. The threshold expression of
 F^2^ > 2sigma(F^2^) is used only for calculating R-factors(gt) etc. and is
 not relevant to the choice of reflections for refinement.  R-factors based
 on F^2^ are statistically about twice as large as those based on F, and R-
 factors based on ALL data will be even larger.
;
 
_refine_ls_structure_factor_coef  Fsqd
_refine_ls_matrix_type            full
_refine_ls_weighting_scheme       calc
_refine_ls_weighting_details
 'calc w=1/[\s^2^(Fo^2^)+(0.0279P)^2^+3.6305P] where P=(Fo^2^+2Fc^2^)/3'
_atom_sites_solution_primary      direct
_atom_sites_solution_secondary    difmap
_atom_sites_solution_hydrogens    geom
_refine_ls_hydrogen_treatment     mixed
_refine_ls_extinction_method      none
_refine_ls_extinction_coef        ?
_refine_ls_number_reflns          4705
_refine_ls_number_parameters      233
_refine_ls_number_restraints      0
_refine_ls_R_factor_all           0.0267
_refine_ls_R_factor_gt            0.0256
_refine_ls_wR_factor_ref          0.0667
_refine_ls_wR_factor_gt           0.0662
_refine_ls_goodness_of_fit_ref    1.165
_refine_ls_restrained_S_all       1.165
_refine_ls_shift/su_max           0.001
_refine_ls_shift/su_mean          0.000
 
loop_
 _atom_site_label
 _atom_site_type_symbol
 _atom_site_fract_x
 _atom_site_fract_y
 _atom_site_fract_z
 _atom_site_U_iso_or_equiv
 _atom_site_adp_type
 _atom_site_occupancy
 _atom_site_symmetry_multiplicity
 _atom_site_calc_flag
 _atom_site_refinement_flags
 _atom_site_disorder_assembly
 _atom_site_disorder_group
C1 C 0.5353(6) 0.4468(6) 0.2320(4) 0.0360(12) Uani 1 1 d . . .
H1A H 0.5162 0.5061 0.2845 0.043 Uiso 1 1 calc R . .
H1B H 0.4389 0.3373 0.2271 0.043 Uiso 1 1 calc R . .
C2 C 0.5194(7) 0.5212(6) 0.1424(3) 0.0312(10) Uani 1 1 d . . .
H2 H 0.4081 0.4844 0.1021 0.037 Uiso 1 1 calc R . .
C3 C 0.6759(6) 0.6479(5) 0.1204(3) 0.0269(9) Uani 1 1 d . . .
H3 H 0.6666 0.7071 0.0688 0.032 Uiso 1 1 calc R . .
C4 C 0.8446(8) 0.6889(6) 0.1722(4) 0.0407(13) Uani 1 1 d . . .
H4A H 0.8962 0.8029 0.1923 0.049 Uiso 1 1 calc R . .
H4B H 0.9242 0.6753 0.1291 0.049 Uiso 1 1 calc R . .
C5 C 0.8562(6) 0.6041(5) 0.2571(3) 0.0258(9) Uani 1 1 d . . .
H5A H 0.9746 0.5992 0.2647 0.031 Uiso 1 1 calc R . .
H5B H 0.8516 0.6654 0.3132 0.031 Uiso 1 1 calc R . .
C6 C 0.7215(6) 0.1207(5) 0.1603(3) 0.0199(8) Uani 1 1 d . . .
C7 C 0.8282(6) 0.1931(5) 0.0773(3) 0.0200(8) Uani 1 1 d . . .
C8 C 0.7535(9) 0.2993(7) 0.0276(4) 0.0406(12) Uani 1 1 d . . .
H8A H 0.7672 0.3859 0.0722 0.061 Uiso 1 1 calc R . .
H8B H 0.6251 0.2373 0.0045 0.061 Uiso 1 1 calc R . .
H8C H 0.8205 0.3429 -0.0255 0.061 Uiso 1 1 calc R . .
C9 C 0.7978(7) 0.0580(6) 0.0057(3) 0.0347(11) Uani 1 1 d . . .
H9A H 0.8586 0.1014 -0.0493 0.052 Uiso 1 1 calc R . .
H9B H 0.6677 -0.0028 -0.0140 0.052 Uiso 1 1 calc R . .
H9C H 0.8474 -0.0111 0.0345 0.052 Uiso 1 1 calc R . .
C10 C 1.0302(7) 0.2856(8) 0.1073(4) 0.0404(12) Uani 1 1 d . . .
H10A H 1.0760 0.2195 0.1429 0.061 Uiso 1 1 calc R . .
H10B H 1.0525 0.3802 0.1471 0.061 Uiso 1 1 calc R . .
H10C H 1.0925 0.3170 0.0513 0.061 Uiso 1 1 calc R . .
C11 C 0.4419(5) 0.0948(5) 0.3407(3) 0.0170(7) Uani 1 1 d . . .
C12 C 0.5553(6) 0.2109(5) 0.4142(3) 0.0192(7) Uani 1 1 d . . .
C13 C 0.7077(6) 0.1806(5) 0.4426(3) 0.0202(8) Uani 1 1 d . . .
C14 C 0.6878(6) 0.0437(5) 0.3878(3) 0.0199(8) Uani 1 1 d . . .
C15 C 0.5241(5) -0.0087(4) 0.3250(3) 0.0176(7) Uani 1 1 d . . .
C16 C 0.2591(6) 0.0710(5) 0.2948(3) 0.0256(9) Uani 1 1 d . . .
H16A H 0.2524 0.0545 0.2264 0.038 Uiso 1 1 calc R . .
H16B H 0.2397 0.1647 0.3097 0.038 Uiso 1 1 calc R . .
H16C H 0.1656 -0.0216 0.3184 0.038 Uiso 1 1 calc R . .
C17 C 0.5189(7) 0.3385(5) 0.4591(3) 0.0273(9) Uani 1 1 d . . .
H17A H 0.4935 0.3149 0.5237 0.041 Uiso 1 1 calc R . .
H17B H 0.4142 0.3441 0.4228 0.041 Uiso 1 1 calc R . .
H17C H 0.6251 0.4401 0.4599 0.041 Uiso 1 1 calc R . .
C18 C 0.8537(7) 0.2664(6) 0.5225(3) 0.0295(9) Uani 1 1 d . . .
H18A H 0.8557 0.3695 0.5378 0.044 Uiso 1 1 calc R . .
H18B H 0.9710 0.2814 0.5041 0.044 Uiso 1 1 calc R . .
H18C H 0.8299 0.2043 0.5777 0.044 Uiso 1 1 calc R . .
C19 C 0.8152(7) -0.0319(6) 0.3970(4) 0.0317(10) Uani 1 1 d . . .
H19A H 0.7874 -0.1022 0.4485 0.048 Uiso 1 1 calc R . .
H19B H 0.9398 0.0501 0.4107 0.048 Uiso 1 1 calc R . .
H19C H 0.8021 -0.0931 0.3380 0.048 Uiso 1 1 calc R . .
C20 C 0.4397(6) -0.1571(5) 0.2617(3) 0.0258(9) Uani 1 1 d . . .
H20A H 0.3667 -0.2451 0.2970 0.039 Uiso 1 1 calc R . .
H20B H 0.5348 -0.1788 0.2377 0.039 Uiso 1 1 calc R . .
H20C H 0.3622 -0.1448 0.2087 0.039 Uiso 1 1 calc R . .
N1 N 0.9776(4) 0.3442(4) 0.3153(2) 0.0170(6) Uani 1 1 d . . .
N2 N 0.7120(4) 0.4433(4) 0.2536(2) 0.0178(6) Uani 1 1 d . . .
O1 O 1.1382(4) 0.3904(4) 0.3472(3) 0.0337(8) Uani 1 1 d . . .
W1 W 0.739455(19) 0.256325(16) 0.290238(9) 0.01366(6) Uani 1 1 d . . .
H6A H 0.590(8) 0.058(7) 0.137(4) 0.032(14) Uiso 1 1 d . . .
H6B H 0.739(8) 0.031(7) 0.181(4) 0.029(14) Uiso 1 1 d . . .
 
loop_
 _atom_site_aniso_label
 _atom_site_aniso_U_11
 _atom_site_aniso_U_22
 _atom_site_aniso_U_33
 _atom_site_aniso_U_23
 _atom_site_aniso_U_13
 _atom_site_aniso_U_12
C1 0.019(2) 0.037(3) 0.057(3) 0.027(2) 0.011(2) 0.015(2)
C2 0.027(2) 0.037(2) 0.032(2) 0.0052(19) -0.0043(19) 0.018(2)
C3 0.030(2) 0.022(2) 0.025(2) 0.0072(16) -0.0002(17) 0.0094(19)
C4 0.044(3) 0.024(2) 0.033(3) 0.0086(19) -0.001(2) -0.004(2)
C5 0.027(2) 0.0183(19) 0.029(2) -0.0010(16) -0.0053(17) 0.0089(18)
C6 0.021(2) 0.0209(18) 0.0146(17) 0.0010(14) 0.0037(15) 0.0054(17)
C7 0.019(2) 0.0222(18) 0.0170(17) 0.0024(14) 0.0035(14) 0.0065(17)
C8 0.058(4) 0.049(3) 0.029(2) 0.016(2) 0.015(2) 0.034(3)
C9 0.038(3) 0.032(2) 0.026(2) -0.0028(18) 0.012(2) 0.006(2)
C10 0.023(2) 0.060(3) 0.028(2) 0.003(2) 0.0070(19) 0.006(2)
C11 0.0126(18) 0.0187(17) 0.0185(17) 0.0043(14) 0.0055(14) 0.0046(15)
C12 0.022(2) 0.0202(18) 0.0166(17) 0.0041(14) 0.0069(15) 0.0090(17)
C13 0.020(2) 0.0244(19) 0.0146(17) 0.0049(14) 0.0034(14) 0.0080(17)
C14 0.022(2) 0.0210(18) 0.0198(18) 0.0078(15) 0.0049(15) 0.0120(17)
C15 0.0168(19) 0.0158(17) 0.0188(17) 0.0035(14) 0.0049(14) 0.0050(15)
C16 0.014(2) 0.025(2) 0.034(2) 0.0055(17) 0.0025(16) 0.0053(17)
C17 0.033(2) 0.027(2) 0.025(2) -0.0020(17) 0.0083(18) 0.015(2)
C18 0.029(2) 0.034(2) 0.0180(19) 0.0026(17) -0.0030(17) 0.008(2)
C19 0.032(3) 0.035(2) 0.039(3) 0.015(2) 0.007(2) 0.024(2)
C20 0.026(2) 0.0189(19) 0.028(2) -0.0004(16) 0.0072(17) 0.0046(18)
N1 0.0038(14) 0.0207(15) 0.0222(16) -0.0003(12) -0.0020(11) 0.0021(13)
N2 0.0130(16) 0.0175(15) 0.0214(16) 0.0029(12) -0.0005(12) 0.0057(13)
O1 0.0166(16) 0.043(2) 0.0382(18) -0.0064(15) -0.0067(13) 0.0120(15)
W1 0.01081(9) 0.01559(8) 0.01358(8) 0.00212(5) 0.00067(5) 0.00487(6)
 
_geom_special_details
;
 All esds (except the esd in the dihedral angle between two l.s. planes)
 are estimated using the full covariance matrix.  The cell esds are taken
 into account individually in the estimation of esds in distances, angles
 and torsion angles; correlations between esds in cell parameters are only
 used when they are defined by crystal symmetry.  An approximate (isotropic)
 treatment of cell esds is used for estimating esds involving l.s. planes.
;
 
loop_
 _geom_bond_atom_site_label_1
 _geom_bond_atom_site_label_2
 _geom_bond_distance
 _geom_bond_site_symmetry_2
 _geom_bond_publ_flag
C1 N2 1.469(5) . ?
C1 C2 1.494(7) . ?
C2 C3 1.404(7) . ?
C3 C4 1.393(7) . ?
C4 C5 1.484(6) . ?
C5 N2 1.465(5) . ?
C6 C7 1.546(5) . ?
C6 W1 2.183(4) . ?
C7 C10 1.518(6) . ?
C7 C9 1.527(6) . ?
C7 C8 1.530(6) . ?
C11 C15 1.426(5) . ?
C11 C12 1.428(6) . ?
C11 C16 1.499(6) . ?
C11 W1 2.465(4) . ?
C12 C13 1.423(6) . ?
C12 C17 1.498(5) . ?
C12 W1 2.383(4) . ?
C13 C14 1.427(6) . ?
C13 C18 1.498(6) . ?
C13 W1 2.316(4) . ?
C14 C15 1.424(6) . ?
C14 C19 1.493(5) . ?
C14 W1 2.375(4) . ?
C15 C20 1.492(6) . ?
C15 W1 2.463(4) . ?
N1 O1 1.233(4) . ?
N1 W1 1.765(3) . ?
N2 W1 1.939(3) . ?
 
loop_
 _geom_angle_atom_site_label_1
 _geom_angle_atom_site_label_2
 _geom_angle_atom_site_label_3
 _geom_angle
 _geom_angle_site_symmetry_1
 _geom_angle_site_symmetry_3
 _geom_angle_publ_flag
N2 C1 C2 112.8(4) . . ?
C3 C2 C1 117.2(4) . . ?
C4 C3 C2 121.6(4) . . ?
C3 C4 C5 118.9(4) . . ?
N2 C5 C4 113.9(4) . . ?
C7 C6 W1 123.8(3) . . ?
C10 C7 C9 108.7(4) . . ?
C10 C7 C8 109.7(4) . . ?
C9 C7 C8 107.1(4) . . ?
C10 C7 C6 113.1(4) . . ?
C9 C7 C6 107.9(3) . . ?
C8 C7 C6 110.1(4) . . ?
C15 C11 C12 107.6(3) . . ?
C15 C11 C16 124.7(4) . . ?
C12 C11 C16 127.4(4) . . ?
C15 C11 W1 73.1(2) . . ?
C12 C11 W1 69.7(2) . . ?
C16 C11 W1 128.0(3) . . ?
C13 C12 C11 108.3(3) . . ?
C13 C12 C17 124.7(4) . . ?
C11 C12 C17 127.0(4) . . ?
C13 C12 W1 69.8(2) . . ?
C11 C12 W1 76.1(2) . . ?
C17 C12 W1 122.4(3) . . ?
C12 C13 C14 107.9(4) . . ?
C12 C13 C18 126.1(4) . . ?
C14 C13 C18 125.7(4) . . ?
C12 C13 W1 75.0(2) . . ?
C14 C13 W1 74.6(2) . . ?
C18 C13 W1 121.1(3) . . ?
C15 C14 C13 107.9(3) . . ?
C15 C14 C19 126.6(4) . . ?
C13 C14 C19 125.5(4) . . ?
C15 C14 W1 76.3(2) . . ?
C13 C14 W1 70.0(2) . . ?
C19 C14 W1 120.5(3) . . ?
C14 C15 C11 108.3(3) . . ?
C14 C15 C20 126.3(4) . . ?
C11 C15 C20 125.0(4) . . ?
C14 C15 W1 69.6(2) . . ?
C11 C15 W1 73.3(2) . . ?
C20 C15 W1 128.5(3) . . ?
O1 N1 W1 168.3(3) . . ?
C5 N2 C1 109.5(3) . . ?
C5 N2 W1 126.6(3) . . ?
C1 N2 W1 123.3(3) . . ?
N1 W1 N2 97.67(15) . . ?
N1 W1 C6 96.80(16) . . ?
N2 W1 C6 106.85(15) . . ?
N1 W1 C13 91.50(15) . . ?
N2 W1 C13 120.32(14) . . ?
C6 W1 C13 130.43(15) . . ?
N1 W1 C14 96.11(15) . . ?
N2 W1 C14 152.43(14) . . ?
C6 W1 C14 95.04(15) . . ?
C13 W1 C14 35.40(14) . . ?
N1 W1 C12 120.57(15) . . ?
N2 W1 C12 94.52(14) . . ?
C6 W1 C12 134.00(15) . . ?
C13 W1 C12 35.21(14) . . ?
C14 W1 C12 57.94(13) . . ?
N1 W1 C15 127.99(14) . . ?
N2 W1 C15 133.31(14) . . ?
C6 W1 C15 79.78(14) . . ?
C13 W1 C15 57.58(14) . . ?
C14 W1 C15 34.17(14) . . ?
C12 W1 C15 56.71(13) . . ?
N1 W1 C11 148.90(14) . . ?
N2 W1 C11 101.67(13) . . ?
C6 W1 C11 100.55(14) . . ?
C13 W1 C11 57.69(14) . . ?
C14 W1 C11 56.97(13) . . ?
C12 W1 C11 34.21(13) . . ?
C15 W1 C11 33.63(12) . . ?
 
loop_
 _geom_torsion_atom_site_label_1
 _geom_torsion_atom_site_label_2
 _geom_torsion_atom_site_label_3
 _geom_torsion_atom_site_label_4
 _geom_torsion
 _geom_torsion_site_symmetry_1
 _geom_torsion_site_symmetry_2
 _geom_torsion_site_symmetry_3
 _geom_torsion_site_symmetry_4
 _geom_torsion_publ_flag
N2 C1 C2 C3 -35.2(7) . . . . ?
C1 C2 C3 C4 8.7(7) . . . . ?
C2 C3 C4 C5 -4.7(8) . . . . ?
C3 C4 C5 N2 27.2(7) . . . . ?
W1 C6 C7 C10 52.7(5) . . . . ?
W1 C6 C7 C9 173.0(3) . . . . ?
W1 C6 C7 C8 -70.4(5) . . . . ?
C15 C11 C12 C13 0.9(4) . . . . ?
C16 C11 C12 C13 174.3(4) . . . . ?
W1 C11 C12 C13 -62.8(3) . . . . ?
C15 C11 C12 C17 -175.9(4) . . . . ?
C16 C11 C12 C17 -2.6(7) . . . . ?
W1 C11 C12 C17 120.3(4) . . . . ?
C15 C11 C12 W1 63.7(3) . . . . ?
C16 C11 C12 W1 -122.9(4) . . . . ?
C11 C12 C13 C14 -1.0(4) . . . . ?
C17 C12 C13 C14 176.0(4) . . . . ?
W1 C12 C13 C14 -67.9(3) . . . . ?
C11 C12 C13 C18 -175.2(4) . . . . ?
C17 C12 C13 C18 1.7(6) . . . . ?
W1 C12 C13 C18 117.8(4) . . . . ?
C11 C12 C13 W1 66.9(3) . . . . ?
C17 C12 C13 W1 -116.1(4) . . . . ?
C12 C13 C14 C15 0.7(4) . . . . ?
C18 C13 C14 C15 175.0(4) . . . . ?
W1 C13 C14 C15 -67.5(3) . . . . ?
C12 C13 C14 C19 -178.0(4) . . . . ?
C18 C13 C14 C19 -3.7(7) . . . . ?
W1 C13 C14 C19 113.8(4) . . . . ?
C12 C13 C14 W1 68.2(3) . . . . ?
C18 C13 C14 W1 -117.5(4) . . . . ?
C13 C14 C15 C11 -0.1(4) . . . . ?
C19 C14 C15 C11 178.6(4) . . . . ?
W1 C14 C15 C11 -63.5(3) . . . . ?
C13 C14 C15 C20 -173.2(4) . . . . ?
C19 C14 C15 C20 5.5(7) . . . . ?
W1 C14 C15 C20 123.4(4) . . . . ?
C13 C14 C15 W1 63.4(3) . . . . ?
C19 C14 C15 W1 -118.0(4) . . . . ?
C12 C11 C15 C14 -0.5(4) . . . . ?
C16 C11 C15 C14 -174.1(4) . . . . ?
W1 C11 C15 C14 61.1(3) . . . . ?
C12 C11 C15 C20 172.7(4) . . . . ?
C16 C11 C15 C20 -0.9(6) . . . . ?
W1 C11 C15 C20 -125.7(4) . . . . ?
C12 C11 C15 W1 -61.6(3) . . . . ?
C16 C11 C15 W1 124.8(4) . . . . ?
C4 C5 N2 C1 -52.4(5) . . . . ?
C4 C5 N2 W1 136.6(4) . . . . ?
C2 C1 N2 C5 56.4(6) . . . . ?
C2 C1 N2 W1 -132.2(4) . . . . ?
O1 N1 W1 N2 135.3(15) . . . . ?
O1 N1 W1 C6 -116.6(15) . . . . ?
O1 N1 W1 C13 14.4(15) . . . . ?
O1 N1 W1 C14 -20.8(15) . . . . ?
O1 N1 W1 C12 35.4(16) . . . . ?
O1 N1 W1 C15 -34.3(16) . . . . ?
O1 N1 W1 C11 7.1(17) . . . . ?
C5 N2 W1 N1 -4.5(4) . . . . ?
C1 N2 W1 N1 -174.4(4) . . . . ?
C5 N2 W1 C6 -104.1(3) . . . . ?
C1 N2 W1 C6 86.0(4) . . . . ?
C5 N2 W1 C13 91.8(4) . . . . ?
C1 N2 W1 C13 -78.1(4) . . . . ?
C5 N2 W1 C14 114.8(4) . . . . ?
C1 N2 W1 C14 -55.1(5) . . . . ?
C5 N2 W1 C12 117.2(3) . . . . ?
C1 N2 W1 C12 -52.7(4) . . . . ?
C5 N2 W1 C15 164.2(3) . . . . ?
C1 N2 W1 C15 -5.7(4) . . . . ?
C5 N2 W1 C11 151.0(3) . . . . ?
C1 N2 W1 C11 -18.9(4) . . . . ?
C7 C6 W1 N1 -51.9(3) . . . . ?
C7 C6 W1 N2 48.3(4) . . . . ?
C7 C6 W1 C13 -149.7(3) . . . . ?
C7 C6 W1 C14 -148.7(3) . . . . ?
C7 C6 W1 C12 162.3(3) . . . . ?
C7 C6 W1 C15 -179.3(4) . . . . ?
C7 C6 W1 C11 154.0(3) . . . . ?
C12 C13 W1 N1 147.7(2) . . . . ?
C14 C13 W1 N1 -98.4(3) . . . . ?
C18 C13 W1 N1 24.3(4) . . . . ?
C12 C13 W1 N2 47.9(3) . . . . ?
C14 C13 W1 N2 161.8(2) . . . . ?
C18 C13 W1 N2 -75.5(4) . . . . ?
C12 C13 W1 C6 -112.0(3) . . . . ?
C14 C13 W1 C6 1.8(3) . . . . ?
C18 C13 W1 C6 124.5(3) . . . . ?
C12 C13 W1 C14 -113.9(4) . . . . ?
C18 C13 W1 C14 122.7(5) . . . . ?
C14 C13 W1 C12 113.9(4) . . . . ?
C18 C13 W1 C12 -123.4(4) . . . . ?
C12 C13 W1 C15 -76.8(2) . . . . ?
C14 C13 W1 C15 37.0(2) . . . . ?
C18 C13 W1 C15 159.7(4) . . . . ?
C12 C13 W1 C11 -36.8(2) . . . . ?
C14 C13 W1 C11 77.1(3) . . . . ?
C18 C13 W1 C11 -160.2(4) . . . . ?
C15 C14 W1 N1 -160.9(2) . . . . ?
C13 C14 W1 N1 84.0(3) . . . . ?
C19 C14 W1 N1 -36.2(4) . . . . ?
C15 C14 W1 N2 79.5(4) . . . . ?
C13 C14 W1 N2 -35.7(4) . . . . ?
C19 C14 W1 N2 -155.9(3) . . . . ?
C15 C14 W1 C6 -63.5(2) . . . . ?
C13 C14 W1 C6 -178.6(3) . . . . ?
C19 C14 W1 C6 61.2(4) . . . . ?
C15 C14 W1 C13 115.2(3) . . . . ?
C19 C14 W1 C13 -120.2(5) . . . . ?
C15 C14 W1 C12 76.7(2) . . . . ?
C13 C14 W1 C12 -38.5(2) . . . . ?
C19 C14 W1 C12 -158.7(4) . . . . ?
C13 C14 W1 C15 -115.2(3) . . . . ?
C19 C14 W1 C15 124.6(5) . . . . ?
C15 C14 W1 C11 35.9(2) . . . . ?
C13 C14 W1 C11 -79.3(3) . . . . ?
C19 C14 W1 C11 160.5(4) . . . . ?
C13 C12 W1 N1 -38.3(3) . . . . ?
C11 C12 W1 N1 -154.2(2) . . . . ?
C17 C12 W1 N1 80.6(4) . . . . ?
C13 C12 W1 N2 -140.0(2) . . . . ?
C11 C12 W1 N2 104.2(2) . . . . ?
C17 C12 W1 N2 -21.1(4) . . . . ?
C13 C12 W1 C6 101.3(3) . . . . ?
C11 C12 W1 C6 -14.6(3) . . . . ?
C17 C12 W1 C6 -139.8(3) . . . . ?
C11 C12 W1 C13 -115.8(3) . . . . ?
C17 C12 W1 C13 119.0(5) . . . . ?
C13 C12 W1 C14 38.7(2) . . . . ?
C11 C12 W1 C14 -77.1(2) . . . . ?
C17 C12 W1 C14 157.6(4) . . . . ?
C13 C12 W1 C15 79.5(3) . . . . ?
C11 C12 W1 C15 -36.3(2) . . . . ?
C17 C12 W1 C15 -161.5(4) . . . . ?
C13 C12 W1 C11 115.8(3) . . . . ?
C17 C12 W1 C11 -125.2(4) . . . . ?
C14 C15 W1 N1 24.4(3) . . . . ?
C11 C15 W1 N1 142.0(2) . . . . ?
C20 C15 W1 N1 -96.3(4) . . . . ?
C14 C15 W1 N2 -141.3(2) . . . . ?
C11 C15 W1 N2 -23.8(3) . . . . ?
C20 C15 W1 N2 98.0(4) . . . . ?
C14 C15 W1 C6 115.1(2) . . . . ?
C11 C15 W1 C6 -127.4(2) . . . . ?
C20 C15 W1 C6 -5.6(4) . . . . ?
C14 C15 W1 C13 -38.4(2) . . . . ?
C11 C15 W1 C13 79.1(2) . . . . ?
C20 C15 W1 C13 -159.1(4) . . . . ?
C11 C15 W1 C14 117.5(3) . . . . ?
C20 C15 W1 C14 -120.7(5) . . . . ?
C14 C15 W1 C12 -80.6(2) . . . . ?
C11 C15 W1 C12 36.9(2) . . . . ?
C20 C15 W1 C12 158.7(4) . . . . ?
C14 C15 W1 C11 -117.5(3) . . . . ?
C20 C15 W1 C11 121.8(5) . . . . ?
C15 C11 W1 N1 -70.1(4) . . . . ?
C12 C11 W1 N1 46.6(4) . . . . ?
C16 C11 W1 N1 168.7(3) . . . . ?
C15 C11 W1 N2 162.6(2) . . . . ?
C12 C11 W1 N2 -80.8(2) . . . . ?
C16 C11 W1 N2 41.4(4) . . . . ?
C15 C11 W1 C6 52.7(2) . . . . ?
C12 C11 W1 C6 169.4(2) . . . . ?
C16 C11 W1 C6 -68.4(4) . . . . ?
C15 C11 W1 C13 -78.8(2) . . . . ?
C12 C11 W1 C13 37.9(2) . . . . ?
C16 C11 W1 C13 160.1(4) . . . . ?
C15 C11 W1 C14 -36.4(2) . . . . ?
C12 C11 W1 C14 80.2(2) . . . . ?
C16 C11 W1 C14 -157.6(4) . . . . ?
C15 C11 W1 C12 -116.7(3) . . . . ?
C16 C11 W1 C12 122.2(4) . . . . ?
C12 C11 W1 C15 116.7(3) . . . . ?
C16 C11 W1 C15 -121.2(5) . . . . ?
 
_diffrn_measured_fraction_theta_max    0.971
_diffrn_reflns_theta_full              28.12
_diffrn_measured_fraction_theta_full   0.971
_refine_diff_density_max    4.495
_refine_diff_density_min   -2.093
_refine_diff_density_rms    0.179
